# Supplementary material
Source: PubMed Central journal article supplement (PMC4475665)
Supplement: NIHMS687213-supplement-1.pdf [file NIHMS687213-supplement-1.pdf]

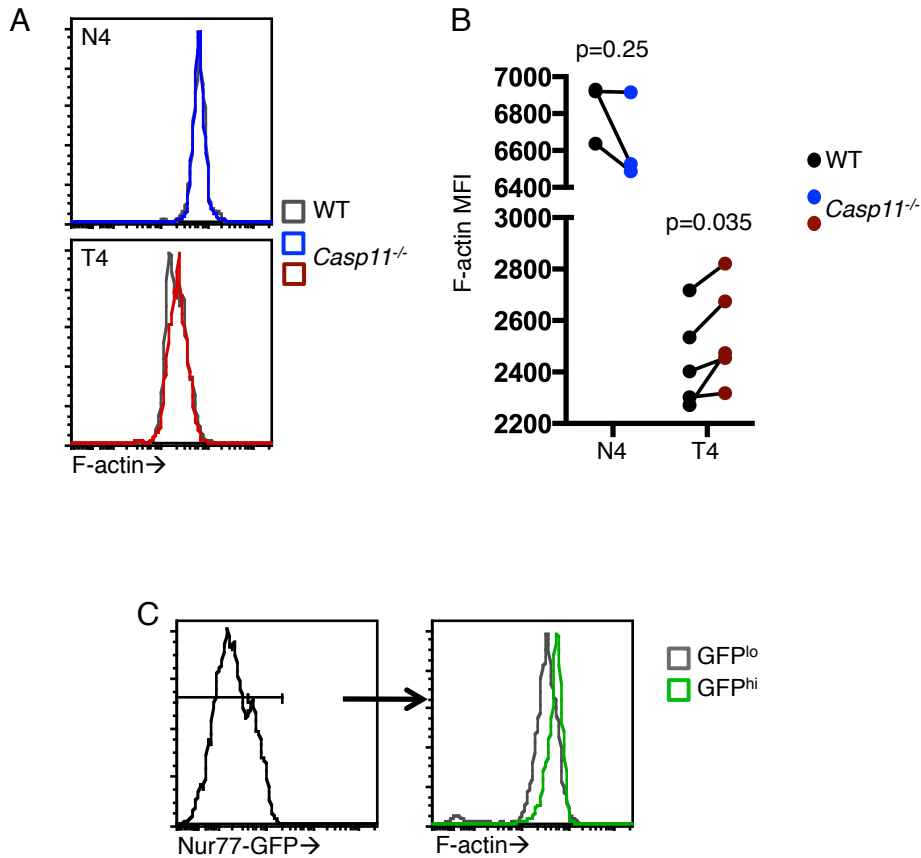

**Supplemental Figure 1: *Casp11*<sup>-/-</sup> OT-I T cells have increased levels of F-actin compared to WT OT-I T cells after stimulation with low affinity peptides.**

(A-B) WT and *Casp11*<sup>-/-</sup> OT-I T cells were stimulated with 1  $\mu$ M N4 or T4 peptide for 60 minutes. F-actin was stained using Alexa Fluor 647 phalloidin. (A) Representative histograms of F-actin levels after N4 (*top panel*) or T4 (*lower panel*) stimulation. (B) MFI of F-actin in WT and *Casp11*<sup>-/-</sup> OT-I T cells, lines connect samples from the same well. Representative of two experiments. (C) WT Nur77-GFP OT-I T cells were stimulated with 1  $\mu$ M T4 for 100 minutes. Nur77-GFP<sup>hi</sup> and Nur77-GFP<sup>lo</sup> cells were gated (*left panel*) and the level of F-actin compared (*right panel*).
